# Supplementary material
Source: PubMed Central journal article supplement (PMC8516730)
Supplement: NIHMS1737001-supplement-1.pdf [file NIHMS1737001-supplement-1.pdf]

**Supplemental Figure 1.** Colocalization of *R. conorii* and host lipid droplets (LDs) during THP-1 macrophage infection. (A) THP-1 macrophages were infected with *R. conorii* (MOI of 2) for 1 hr and 24 hrs before visualization (using 63X objective) of LDs in infected cells and colocalization analysis. Inset shows area of analysis of fluorescent intensity and yellow lines indicate objects being analyzed. (B) ImageJ software was used to determine the the fluorescent intensity of objects along the yellow lines indicated in (A). Overlapping peaks indicate colocalization of respective objects. Red signifies LDs, green signifies *R. conorii*, and blue signifies nuclei.

**Supplemental Figure 2.** Analysis of THP-1 macrophage viability in the presence of inhibitors. MTT cell viability analysis of THP-1 macrophages treated with varying concentrations of Orlistat (50  $\mu$ M – 0.08125  $\mu$ M) (A), Etomoxir (200  $\mu$ M – 0.325  $\mu$ M) (B), GW6471 (14.8  $\mu$ M – 0.029  $\mu$ M) (C), or GW9662 (50  $\mu$ M – 1.30  $\mu$ M). Cell survival is plotted as percent of DMSO control.

**Supplemental Figure 3.** PPAR $\alpha$  and  $\gamma$  protein levels at early and replicative stages of infection. (A) Immunoblotting with whole cell lysates for protein expression of PPAR $\alpha$  at 1 hpi and 24 hpi in uninfected or *R. conorii* infected (MOI of 2) THP-1 macrophages. (B) Immunoblotting with whole

969 cell lysates for protein expression of PPAR $\gamma$  at 1 hpi and 24 hpi in uninfected or *R. conorii*  
970 infected (MOI of 2) THP-1 macrophages.  
  
971

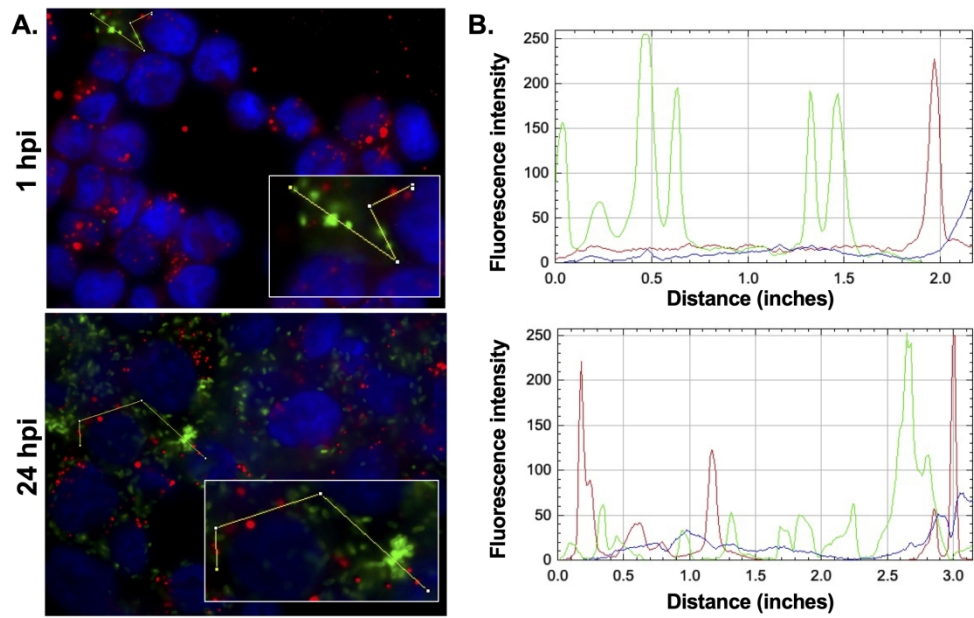

980x614mm (72 x 72 DPI)

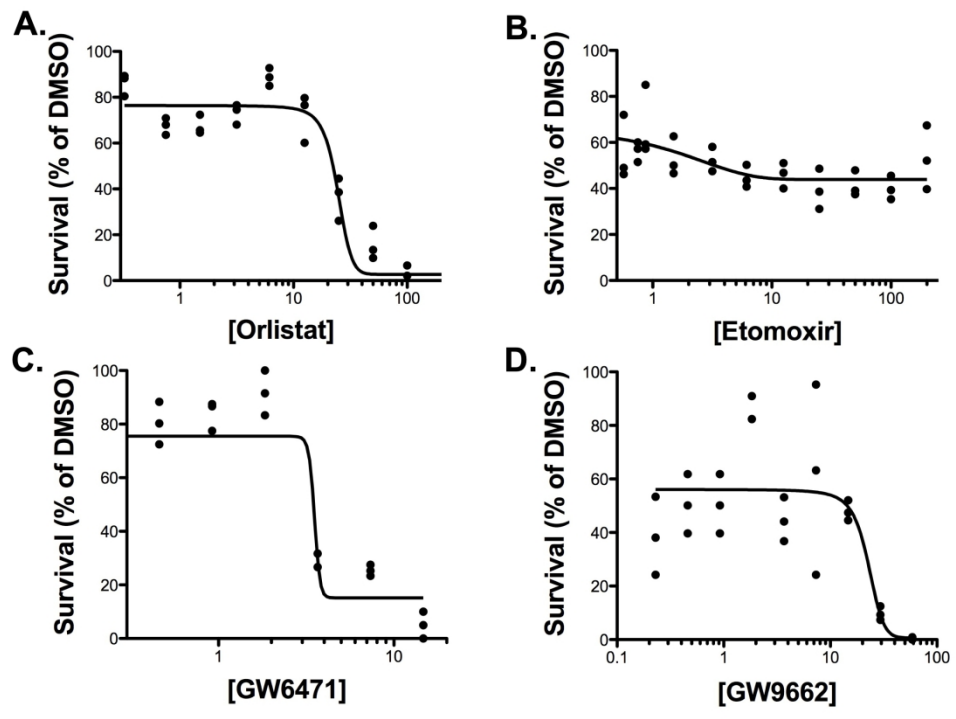

1058x777mm (72 x 72 DPI)

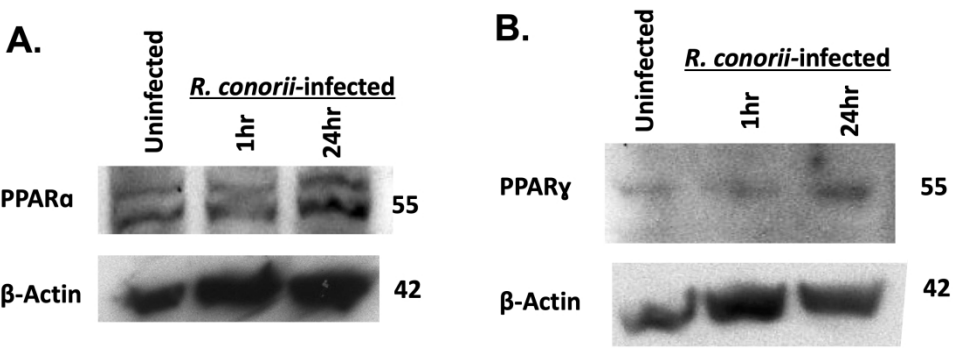

971x420mm (72 x 72 DPI)
